# Supplementary material
Source: publisher figshare collection journal article supplement (https://gsajournals.figshare.com/ndownloader/files/12249356)
Supplement: Supplementary file 1 [file 12249356]

## Sheet: TableS2a_tetraploid genotypes
Details of tetraploid germplasm present in the association panel
Population (Q)	Kinship Group (K)	Name	Market class/Purpose	French Fry	Crisp	After Cooking Darkening	Taste	Dry Matter	Starch	Origin	Year of release	Maturity
1	1	Sierra Gold	Multi-purpose	Good			Good			USA	2003	Int/Late
1	1	Birchbark								USA		Int
1	1	Toolangi Delight	Multi-purpose							Australia	1986	Early/Int
1	1	Rio Rojo								USA
1	1	Kennebec	Multi-purpose/Salad	Poor/Mod/Good	Poor/Good	Trace	Poor/Mod/Good	Med/High	Low/Med/High	USA	1948	Early/Int/Late
1	1	Emperor			Good	None				USA	2001	Early
1	1	Superior	Multi-purpose/Salad		Good		Good	Med/High	Low/Med/High	USA	1961	Early/Int
1	1	Courlan						High		USA	1999	Early
1	1	Russet Norkotah	Multi-purpose/Floury					Medium		USA	1987	Early
1	1	NDTX 4271 5-R								USA
1	1	YUKON GOLD	Floury			None/Trace		Med/High		Canada	1980	Early/Int
1	1	Red Pontiac	Multi-purpose	V Poor/Poor/Mod	V Poor/Poor/Mod	Trace/Little		Low/Med/High	V Low/Low/Med	USA	1949	Early/Int
1	1	Atlantic	Multi-purpose/Floury	Good/V Good	Good	Trace/Little/Some	Good	Med/High	Low/Med/High	USA	1976	Int/Late
1	1	Dark Red Norland	Multi-purpose			Trace		Low/Med/High	Med/High	USA	1998	Int/Late
1	1	Shepody	Floury	Poor/Mod/Good/V Good	Mod/Good	None/Trace/Little	Good	Low/Med/High	Med/High	Canada	1980	Early/Int
1	1	Karlena	Floury	Good/V Good	Good	Some		High/V High	Med/High	Germany	1988	Early
1	1	COTX 04015 3AW/Y								USA
1	1	Vales Russet
1	1	3053-18
1	1	Ranger Russet		Good	Good			High		USA	1991	Late
1	1	Olympus				None/Trace				United Kingdom		Intermediate
1	3	Spunta	Multi-purpose	Poor/Mod/Good	Poor/Good	None/Trace/Little	Mod/Good	Low/Med/High	Low/Med	Netherlands	1968	Early/Int
1	4	GLADIATOR								New Zealand	1995
1	4	Opera								Netherlands	2007
1	4	2424A(5)
1	5	Linton								USA
1	5	Rubesse	Multi-purpose	Good			Good			United Kingdom	2010	Early
1	5	Madingley								USA
1	5	Chieftain	Multi-purpose	Poor	Poor	Trace		Low/Med	Medium	USA	1966	Early
1	5	Innovator	Multi-purpose/Floury	Good		Trace		Med/High		Netherlands	1999	Early
1	6	Russet Burbank	Multi-purpose/Floury	Mod/Good/V Good	Moderate	Trace	Good	Med/High/V High	Med/High	USA	1908	Early/Int/Late
1	6	Frontier Russet								USA	1990	Early
2	1	Adirondack								USA	1881	Intermediate
2	2	GL.76B/94
2	2	RATTE	Multi-purpose/Salad	Poor/Mod	V Good	None/Trace/Little/Some	Good/Excellent	Med/High	Low/Med/High	Germany	1872	Early/Int
2	2	GL.76B/102
2	2	BF 15	Salad	Poor	Poor	None/Trace/Some	Good/Excellent	Low/Med/High	Low	France	1947	Early/Int
2	2	GL.79/42
2	2	GL.78/97
2	2	GL.78/166
2	2	Myatt's Ashleaf								United Kingdom	1804	Early
2	2	International Kidney	Multi-purpose	Poor	Poor	Little	Mod/Good	Low/Med	Low/Med	United Kingdom	1879	Int/Late
2	2	GL.79/45
2	2	Belle de Fontenay	Salad		Poor	None/Trace/Some	Good/Excellent		Low/Med	France	1985	V Early
2	2	SHET. BLACK sasa08								United Kingdom	1923	Early/Int/Late
2	2	GL.77/58
2	2	GL.78/53
2	2	Highland Bur. Red								United Kingdom	2005
2	3	Defender								USA
2	3	Sassy								France	2004
2	3	Azul		V Good	Mod			Med	Med	Spain
2	3	Maris Anchor				None		Medium	Low/Med	United Kingdom	1971	V Early
2	3	Arran Consul	Multi-purpose/Floury	Poor	Poor	Little/Some	Mod/Good	Low/Med	Low	United Kingdom	1924	Int/Late
2	3	EGINHIEMER	Floury	Poor	Poor	None	Good/Excellent	Very High	High	Netherlands	1893	Early/Int
2	3	1563C(14)
2	3	Patrones	Multi-purpose/Floury	Poor/Mod/Good	Poor/Mod	Trace	Mod/Good	High	Med/High	Netherlands	1959	Early/Int/Late
2	4	Edzell Blue	Salad	Poor	Poor	Severe	Mod/Good			United Kingdom	early 1900s	Early/Int
2	4	British Queen	Multi-purpose	Poor	Poor	Some	Good/Excellent		Medium	United Kingdom	1894	Early/Int
2	5	Shelford				None/Trace				USA		Intermediate
2	5	Rudolph								United Kingdom	2006	Early
2	6	Duke of York	Multi-purpose/Salad			None/Trace/Some	Mod/Good	Low/Med/High	Low/Med	United Kingdom	1891	V Early
2	6	Epicure	Salad	Poor	Poor	None/Trace	Mod/Good	Medium	Low	United Kingdom	1897	V Early
2	6	Eclipse	Multi-purpose			None				United Kingdom	1966	V Early
2	6	Fortyfold	Multi-purpose/Salad			Little	Moderate			United Kingdom	1836	Intermediate
2	6	Royal Kidney	Multi-purpose/Salad	Poor	Poor	None/Trace/Some	Mod/Good	Low/Med	Medium	United Kingdom	1899	Early/Int
2	6	Golden Wonder	Floury	Good	Good	None/Trace	Good	High/V High	High	United Kingdom	1906	Late/V Late
2	6	Fiftyfold								United Kingdom	1882	Early
2	6	Sharpe's Express	Floury/Salad	Poor	Poor	None/Trace/Severe	Mod/Good	High	Medium	United Kingdom	1901	V Early/Early
2	6	King Edward	Multi-purpose/Floury	Poor	Poor/Good	None/Trace/Some	Mod/Good	Medium	Medium	United Kingdom	1902	Int/Late
2	7	1512C(16)
2	7	Blush						V Low		United Kingdom	1998	V Early
2	7	Craigs Snow-White								United Kingdom	1947	Late
2	7	Doon Pearl	Salad			Some	Mod/Good	Med	Med	United Kingdom	1931	Int
2	7	Arran Banner	Multi-purpose/Floury	Poor/Good/V Good	Poor/Mod/Good	None/Trace	Mod/Good	Low/Med	Low/Med	United Kingdom	1927	Early/Int/Late
2	7	Kerr's Pink	Multi-purpose/Floury	Good	Good	None/Trace/Little	Good	High	Medium	United Kingdom	1907	Late/V Late
2	7	Dunbar Standard	Multi/Floury/Salad	Poor	Poor	None/Trace/Some	Mod/Good/Excellent	High	Medium	United Kingdom	1936	Late/V Late
2	7	Arran Victory	Salad/Floury	Poor	Poor	Trace/Severe	Good/Excellent	Med/High	Med	United Kingdom	1918	Int/V Late
2	7	Sefton Wonder	Floury				Good		Low/Med	United Kingdom		Intermediate
2	9	Umatilla Russet		Good		None				USA	1998	Late
3	3	Saphire								Netherlands	2004
3	3	Almera	Multi-purpose/Floury	Poor	Poor	Trace/Little	Mod/Good	High	Med/High	Netherlands	1999	Early
3	3	Ausonia	Multi-purpose	Poor	Poor	None/Trace	Mod/Good	Med/High	Med	Netherlands	1981	Early/Int
3	3	Jaqueline								Germany	1996
3	3	Jaerla	Multi-purpose/Salad	V Poor/Poor	Poor/Mod	None/Trace/Little/Some	Mod/Good	V Low/Low/Med	V Low/Low/Med	Netherlands	1969	V Early/Early
3	3	Cosmos						Med/High		Netherlands	1994	Intermediate
3	3	Morene	Floury	Good	Poor	None/Trace/Little	Mod/Good	High/V High	Med/High/V High	Netherlands	1983	Int/Late
3	3	Adora	Multi-purpose/Salad	Poor	Poor	None/Trace	Good	V Low/Low		Netherlands	1990	V Early/Early
3	3	Cleopatra	Multi-purpose	Poor/Mod	Poor	None/Trace/Little	Mod/Good	Low/Med/High	Low/Med	Netherlands		V Early/Early
3	3	Marfona	Multi-purpose	Poor	Poor	None/Trace	Mod/Good	Low/Med/High	Low/Med	Netherlands	1977	Early/Int
3	3	Maranca	Multi-purpose/Salad			None		Low/Med		Netherlands	1995	Early/Int
3	3	Wilja	Multi-purpose	Poor	Poor	None/Trace/Little	Good	Medium	Low/Med	Netherlands	1967	Early/Int
3	3	Sante	Multi-purpose/Floury	Poor/Mod/Good	Poor/Mod/Good	Trace/Little	Mod/Good	Med/High	Med/High	Netherlands	1983	Early/Int/Late
3	3	Herald							Low	United Kingdom	1928	V Early/Early
3	3	Sheriff				Trace/Little		High		United Kingdom	1981	Int
3	3	Blue Danube								United Kingdom	2010
3	3	Ajiba	Multi-purpose			Trace/Little		Med/High		Netherlands	1992	Early/Int
3	3	Celine						Low/Med		United Kingdom	1999	Early
3	3	Siffra	Multi-purpose							Netherlands	2008	Early/Int/Late
3	3	Pepo (1993)	Floury		V Good				Med/High	Germany	1993	Int
3	3	Lady Christl	Multi-purpose/Salad			None/Trace		Medium		Netherlands	1996	V Early/Early
3	3	Vantage		Poor	Poor	Trace/Little		High		Netherlands	1983	Intermediate
3	3	Van Gogh	Multi-purpose/Floury	Good	Poor/Good	None/Trace	Mod/Good	Med/High	High	Netherlands	1989	Int/Late
3	3	Sofia	Salad							Netherlands	2004	Intermediate
3	3	Premiere	Multi-purpose/Floury	Good	Poor/Good	None/Trace	Good	Low/Med/High	Med/High	Netherlands	1979	V Early/Early
3	3	Horizon			Mod/Good	None				United Kingdom	2001	Intermediate
3	3	Riviera		Mod	Mod			Low		Netherlands	1998	V Early
3	3	Stormont Enterprise				Little		Med/High		United Kingdom	1969	Early/Int
3	3	MIRA								Germany	1995
3	4	DRAGA	Multi-purpose/Floury	Poor/V Poor	Poor	Trace/Little/Some	Moderate	Low/Med	V Low/Low/Med	Netherlands	1970	Early/Int
3	4	Pentland Crown	Multi-purpose/Floury	Poor/Good	Poor/Good	Trace/Some	Good	Medium	Medium	United Kingdom	1959	Early/Int/Late
3	4	3681AD(1)
3	4	Balmoral	Multi-purpose			Trace/Little		Low/Med		Ireland	1989	Early/Int/Late
3	4	Smiths Comet				Trace				Australia	1999	Int
3	4	BIONICA ex SASA								Netherlands	2008
3	4	Fianna	Floury	Good		Trace		Med/High		Netherlands	1987	Intermediate
3	4	Victoria	Multi-purpose/Floury	Good		None/Trace		Med/High		Netherlands		Early/Int
3	4	Lionheart								United Kingdom	2012
3	4	05M 004-003
3	4	05M 004-008
3	4	05M 012-004
3	5	Diva								United Kingdom	2011	Early
3	5	Kuroda	Multi-purpose/Floury			Trace		Med/High		Netherlands	1998	Early/Int
3	5	Pentland Javelin	Multi-purpose/Floury	Poor	Poor	None/Trace/Little	Good	Low/Med	Low/Med	United Kingdom	1968	V Early
3	5	Zorba	Multi-purpose	Excellent			V Good			Spain	1997	Intermediate
3	5	Santana	Floury	Good		Trace				Netherlands	1994	Early/Int
3	5	Europa	Multi-purpose/Salad	Poor	Poor	None/Trace	Good/Excellent	V Low/Low/Med	V Low/Low	France	1989	V Early/Early
3	5	Goldstar					Excellent		High	Netherlands		Early/Int
3	5	Remarka	Multi-purpose/Floury	Good		None/Trace		Med/High		Netherlands	1991	Early/Int/Late
3	5	Corine	Multi-purpose/Salad	Good	Poor	None/Trace/Some/Severe	Mod/Good	Low/Med/High	Low/Med	Netherlands	1976	V Early
3	5	Lady Claire			Good			High/V High		Netherlands	1996	Early
3	5	Lady Jo								Netherlands	2001
3	5	Record	Multi/Floury/Salad	Poor/Mod/Good	Good	None/Trace/Little	Mod/Good	Med/High	Med/High/V High	Netherlands	1932	Early/Int/Late
3	5	LIBERTAS	Floury	Poor/V Good	Poor/Mod	Trace/Some/Severe	Good/Excellent	V High	V Low/Low/High/V High	Netherlands	1946	Int/Late
3	7	Maria(1972)					Mod/Good		Low	Sweden	1972	Early
3	9	Avalanche	Multi-purpose			Trace		Low		United Kingdom	1989	Early
3	9	Baillie	Salad	Poor	Poor	None/Trace/Severe	Good	Low/Med	Low	United Kingdom	1981	Early
3	10	Casablanca								United Kingdom	2010
4	3	Lanorma								Netherlands	2006	Early
4	3	Mozart								Netherlands	2003
4	3	Caesar	Floury	Good	Poor/Mod	None/Trace		Med/High	Low/Med	Netherlands	1990	Early/Int
4	3	Sylvana	Multi-purpose							Netherlands	2008	Early
4	3	Marabel								Netherlands	1993	Early
4	3	AOTX. 3564 1Y/Y
4	3	Toluca								Netherlands	2006
4	3	Desiree	Multi-purpose/Floury	Mod/Good/V Good	Poor/Mod/Good	None/Trace/Little	Mod/Good	Med/High	Low/Med/High	Netherlands	1962	Int/Late
4	3	Amorosa	Multi-purpose/Salad	Moderate		Trace/Little	Good	Med/High		Netherlands	2000	Early
4	3	Romano	Multi-purpose/Floury	Poor/Mod/Good	Poor/Mod/Good	Trace/Little	Mod/Good	Low/Med	Low/Med	Netherlands	1981	Early/Int
4	3	Escort	Multi/Floury/Salad	Poor/Mod/Good	Poor/Mod/Good	None/Trace/Severe	Mod/Good	Med/High		Netherlands	1982	Early/Int/Late
4	3	Festival								Netherlands	2010
4	3	Arkula	Multi-purpose/Floury	Good	Poor	None/Trace	Mod/Good	Low/Med	Low/Med	Germany	1975	V Early
4	3	Vivaldi	Multi-purpose			None/Trace		V Low		Netherlands	1998	Early/Int
4	3	Alwara	Multi-purpose/Salad	Poor/Mod/Good	Poor/Good/V Good	Trace/Little	Mod/Good	High	Medium	Germany	1985	Early/Int
4	3	Chopin								Netherlands	2007
4	3	Erntestolz	Multi/Floury/Salad	Poor	Good	Trace/Some/Severe	Mod/Good	Med/High	Med/High	Germany	1976	Early/Int/Late
4	3	Oriana								Netherlands	2006
4	3	Carola	Multi-purpose			Trace	Good	Med	Low/Med	Germany		V Early/Early
4	3	Novella								Netherlands	2005
4	3	Sarpo Mira	Multi-purpose/Floury	Good		None				Hungary		V Late
4	3	Darwina		Poor	Poor		Moderate	Med/High/V High	High	Netherlands	1981	Int/Late
4	3	Carlita	Multi-purpose/Salad			None/Trace		V Low/Low/Med		Netherlands	1991	V Early/Early
4	3	Armada	Multi-purpose/Salad					V Low		Netherlands		V Early/Early
4	3	G.8884(2)
4	3	Producent								Netherlands	1974
4	3	Sarpo Shona								United Kingdom	2010
4	3	Crisps for All								Netherlands	2008
4	3	Moira				None		Low/Med		United Kingdom	1984	Early
4	3	Alpha	Multi-purpose/Floury	Poor	Poor	Trace/Little	Mod/Good	High	Med/High	Netherlands	1874	Int/Late
4	3	GLORIA(1937)	Multi-purpose/Floury	Poor/Good	Poor/Mod	None/Trace	Good	High	Med/High	Netherlands	1937	V Early/Late
4	3	Elisabeth								Netherlands	2002
4	3	Amadra
4	3	Milva						High		Germany	1998
4	3	Courage								Netherlands	1998
4	3	Mustang								Austria	2005	Early
4	3	Saturna	Multi-purpose/Floury	Poor	Good/V Good	None/Trace	Mod/Good	High/V High	Med/High/V High	Netherlands	1964	Early/Int/Late
4	3	Pimpernel	Floury	Poor/Mod/Good/V Good	Poor/Mod	Trace/Little	Good/Excellent	V High	Low/Med/High	Netherlands	1953	Int/Late/V Late
4	3	Kifli								United Kingdom	2010
4	3	Lady Rosetta	Multi-purpose/Floury		Mod/Good	None/Trace	Good/Excellent	High/V High	Med/High	Netherlands	1988	Early/Int
4	4	Marilyn								Netherlands	2006
4	4	Torridon				Trace/Little		High		United Kingdom	1988	Int/Late
4	4	Sava	Multi-purpose/Salad	Poor	Poor	Trace	Good/Excellent	Medium	Low/Med	Denmark	1981	Early/Int
4	4	Galactica								Ireland	2003
4	4	Agria	Multi-purpose/Floury	Good/V Good	Poor/Good	None/Trace	Good/Excellent	Low/Med/High	Low/Med	Germany	1985	Int/Late
4	4	Arielle	Multi-purpose					Low		Netherlands	1999	Early
4	4	Arran Pilot	Salad	Poor	Poor	Trace/Little	Good	Low/Med	Low/Med	United Kingdom	1930	V Early/Early
4	4	Ditta	Multi-purpose/Salad	Poor	Poor	Trace/Little	Mod/Good	Low/Med/High	Low/Med	Austria	1989	Early/Int
4	4	Timate	Multi-purpose/Floury	Poor	Poor	None/Trace	Mod/Good	Med/High	Med/High	Netherlands	1984	Early/Int
4	4	Fontane				Trace		High		Netherlands	1999	Intermediate
4	4	Nicola	Multi-purpose/Salad	Poor/Mod/Good	V Poor/Poor	None/Trace/Some	Good	Med/High	Low/Med/High	Germany	1973	Early/Int/Late
4	4	Kufri Chandramukhi							Low	India	1966
4	4	Rembrandt								Netherlands	2001
4	4	Hermes	Multi-purpose/Floury	Poor/Good/V Good	Mod/Good/V Good	Trace/Little/Some	Mod/Good	Med/High/V High	Med/High	Austria	1973	Early/Int
4	4	Annabelle								Netherlands	2001	V Early
4	4	Madeleine								Netherlands	2004
4	4	05M 002-001
4	4	Megara								Italy	2008
4	4	Markies	Multi-purpose/Floury			None/Trace		High		Netherlands	1997	Late
4	4	Orchestra								Netherlands	2007
4	4	Arran Peak	Multi/Floury/Salad			Little/Some/Severe	Mod/Good	Med	Low/Med	United Kingdom	1930	Int/Late/V Late
4	4	Melody								Netherlands	2001
4	4	01C 071-002
4	4	Alava		Good/V Good	Good	Trace/Little		Medium	Low/High	Germany		Int/Late
4	4	Bintje	Multi/Floury/Salad	Good/V Good	Poor/Mod/Good	None/Trace/Some	Mod/Good/Excellent	Med/High	Low/Med/High	Netherlands	1910	Early/Int
4	4	Estima	Multi-purpose/Floury	Poor	Poor	None/Trace/Little	Mod/Good	Low/Med/High	Medium	Netherlands	1973	Early/Int
4	4	Challenger								Netherlands	2008
4	4	Hunter(2004)		Mod/Good		Trace		Med		United Kingdom	2004	Int
4	5	Minea	Salad	Poor	Poor	None/Trace	Mod/Good	Low/Med	Low	Denmark	1963	V Early
4	5	Safari	Multi-purpose				Good	Moderate		Netherlands	2006
4	5	Juliette	Salad					Low/Med		France	1997	Early/Int/Late
4	5	Pentland Marble				None		Low/Med		United Kingdom	1970	V Early
4	5	Panda	Multi-purpose/Floury	Poor/Good	Mod/Good/V Good	Little		V High	Med/High	Germany	1986	Int/Late/V Late
4	5	Arnova	Multi-purpose			None				Netherlands	1999	Early
4	5	Pioneer							Low/Med	United Kingdom	2012
4	5	Adretta	Floury	Poor/Good	Poor/Mod	Trace/Little	Good/Excellent	High/V High	Medium	Germany	1975
4	5	Linda								Germany	1974	Intermediate
4	5	Harlequin				Trace				United Kingdom	2003	Intermediate
4	5	Serafina	Salad							Germany	1996
4	5	Granola	Multi-purpose	Poor/Mod/Good	Poor/Mod/Good	None/Trace/Little	Mod/Good	Med/High	V Low/Low/Med	Germany	1975	Int/Late
4	5	5008AB(6)
4	5	Charlotte	Salad	Poor	Cood	None/Trace	Good/Excellent	Low/Med/High	Low	France	1981	Early
4	5	Exquisa	Multi-purpose/Salad			None		Med/High		Germany	1992	Int/Late
4	5	Anya	Multi-purpose/Salad			Trace		Med/High		United Kingdom	1996	Intermediate
4	5	Linzer Delikatess	Multi-purpose/Salad	Poor/V Good	Poor	None/Trace	Mod/Good	V Low/Med/High	Low/Med	Austria	1975	V Early/Early/Int
4	5	Pepo (1978)								Germany		Intermediate
4	5	Robijn	Floury				Good		V High	Netherlands	1926	V Late
4	5	G.8883(9)
4	5	Verdi			V Good	Little		High		Germany	2003
4	5	Rode Star					Good		V High	Netherlands	1908	Late
4	8	Kufri Jyoti						Medium	Low	India	1968
4	8	G.8107(1)
4	8	Esmeralda								France
4	9	Stemster	Multi-purpose/Salad		Poor/Mod	None/Trace		Low/Med/High	Medium	United Kingdom	1986	Int/Late
5	3	Burren								Ireland	1993	Intermediate
5	3	02C 053-016
5	3	Eos								Netherlands	2000
5	3	Mondial	Multi-purpose/Floury	Poor/Good	Poor/Good	None/Trace/Little	Mod/Good	Low/Med/High	Low/Med	Netherlands	1987	Int/Late
5	3	Shelagh	Multi-purpose	Poor	Poor	Trace		Med/High		United Kingdom	1986	Intermediate
5	3	Golden Nugget								United Kingdom	2011
5	3	Mimi	Salad			None				United Kingdom	2003	V Early
5	4	Provost		Poor	Good	None/Trace		Low/Med		United Kingdom	1981	V Early
5	4	Majestic	Multi-purpose/Floury	Poor	Poor	Little/Some/Severe	Good	Medium	Medium	United Kingdom	1911	Int/Late
5	4	Pentland Squire	Multi-purpose/Floury	Poor	Poor	None/Trace		Med/High		United Kingdom	1970	Intermediate
5	4	Rooster	Multi-purpose/Floury	Good				High		Ireland	1990	Late
5	4	Vales Emerald				None/Trace				United Kingdom	2005	V Early
5	4	Romeo								Netherlands	1972
5	4	GL.77M/106
5	4	Bonnie								United Kingdom	1987
5	4	Eve Balfour				None/Trace				United Kingdom	2002	Intermediate
5	7	Carlingford	Multi-purpose/Salad	Poor	Poor	None/Trace	Mod/Good	Low/Med	Low/Med	United Kingdom	1982	Early/Int
5	7	Dr. McIntosh	Multi/Floury/Salad	Poor	Poor	None/Trace/Some	Mod/Good	Low/Med/High		United Kingdom	1944	Intermediate
5	7	Maris Peer		Poor	Poor	None		Low/Med	Medium	United Kingdom	1962	Early
5	7	Maris Page								United Kingdom	1962	Early
5	7	Gemson				None/Trace				United Kingdom	2008	Early
5	7	Maris Bard	Multi-purpose/Salad	Poor	Poor	None/Trace/Little	Good/Excellent	Low	Medium	United Kingdom	1972	V Early/Early
5	7	Pentland Dell	Multi-purpose	Poor	Poor	Little	Good	High	High	United Kingdom	1961	Early/Int/Late
5	7	Home Guard	Multi-purpose/Floury	Poor	Poor	None/Trace/Little/Some	Mod/Good	Low/Med	Low/Med	United Kingdom	1943	V Early/Early
5	7	Ulster Sceptre		Poor	Poor	Trace/Little	Good	Low	Low	United Kingdom	1964	V Early/Early
5	7	XD2-21
5	7	Ulster Prince	Salad	Poor	Poor	None/Little	Mod	Low/High	V Low/Med	United Kingdom	1947	V Early/Early
5	7	Pentland Ace							Low	United Kingdom	1952	Early
5	7	R.P.LUSTRE
5	7	Pentland Beauty	Multi-purpose/Floury			Trace	Good	High	Low/Med	United Kingdom	1955	V Early/Early
5	8	G.8866(1)
5	8	G.8866(11)
5	8	G.8867(15)
5	8	8204 A 4
5	8	Stirling	Multi-purpose			Trace/Little		Low/Med		United Kingdom	1991	Int/Late
5	8	2182EF(7)
5	8	G.8867Y%12
5	8	Pentland Hawk	Multi-purpose/Floury	Poor	Poor	Trace/Little	Mod/Good	Med	Med/High	United Kingdom	1967	Int/Late
5	8	Pentland Ivory	Multi-purpose/Salad	Good	Good	None/Trace/Little	Good	High	High	United Kingdom	1967	Early/Int/Late
5	8	06C 127-002
5	8	H1H3 (89)
5	8	Shula	Multi-purpose	Poor	Poor	None/Trace		Medium		United Kingdom	1986	Int/Late
5	8	Morag	Multi-purpose	Poor	Poor	Trace		High		United Kingdom	1985	Intermediate
5	8	2070(54)
5	8	12636 A 2
5	8	12601AB1
5	9	Pixie				None/Trace				United Kingdom	2006	Intermediate
5	9	Bounty						Low		United Kingdom	2010
5	9	Tay			Good	Trace/Little				United Kingdom	2001	Intermediate
5	9	Valor	Multi-purpose/Floury			None		Low/Med		United Kingdom	1993	Int/Late
5	9	Setanta		Good				High		Ireland	2004	Late
5	9	Cramond				Little		Medium		United Kingdom	1992	Int/Late
5	9	Maxine	Multi-purpose			None/Trace		Low/Med		United Kingdom	1994	Intermediate
5	9	Teena	Multi-purpose	Poor	Good	Trace		High		United Kingdom	1986	Int
5	9	Royal		Good						Denmark	2008
5	9	Bambino				None/Trace				United Kingdom	2005	Late
5	9	Brodick	Floury	Poor/Mod	V Good	Trace/Little/Some		Med/High/V High	High	United Kingdom	1990	Intermediate
5	9	Dundrod	Salad	Poor	Good	None		Med/High		United Kingdom	1987	V Early/Early
5	9	Excalibur								United Kingdom	2009
5	9	Winston	Multi-purpose/Salad			None/Trace		V Low/Low		United Kingdom	1992	V Early
5	9	Harborough Harvest						High/V High		United Kingdom	1999	V Late
5	9	Glamis	Multi-purpose			None		Medium		United Kingdom	1992	Int/Late
5	9	Kingston		Poor	Poor	Trace		Medium		United Kingdom	1981	Late
5	9	Kirrie	Salad			Trace		V Low/Low		United Kingdom	1996	V Early
5	9	Stamina	Multi-purpose/Salad			Trace		Low		United Kingdom	1992	Intermediate
5	9	00C133-020
5	9	02M 012-001
5	9	04C 055-004
5	9	04C 126-005
5	9	Jamila	Multi-purpose			None/Trace		Med		United Kingdom	1994	Int
5	9	04M 034-013
5	9	12288 AF 23
5	9	Rocket	Multi-purpose/Salad	Poor	Poor	None/Trace		Low/Med		United Kingdom	1987	V Early
5	9	Daisy	Multi-purpose					Medium		France	1998	Early/Int
5	9	Maris Piper	Floury		Poor	None	Good	Low/High/V High	Medium	United Kingdom	1963	Int/Late
5	9	Midas				None/Trace		High/V High		United Kingdom	1997	Int/Late
5	9	Paladin	Multi-purpose			Little		Med/High		United Kingdom	1988	Intermediate
5	9	BENOL	Multi-purpose/Floury	Poor	Poor			High	Med/High	Germany/Netherlands	1984	Int/Late
5	9	03M 016-002
5	9	Chicago								United Kingdom	2011
5	9	Scarborough		Good		Trace/Little				United Kingdom	2001	Late
5	9	Golden Millennium						High		United Kingdom	1999	Intermediate
5	9	Nadine	Multi-purpose	Poor	Poor	None		V Low/Low		United Kingdom	1987	Early
5	9	Ailsa	Multi-purpose/Salad	Poor	Poor	Trace/Little/Severe	Good	High	ray	United Kingdom	1984	Intermediate
5	9	D22/1
5	9	H1H3 (3)
5	9	Navan		Poor/Good/V Good	Poor/Good	None/Trace/Little		High/V High	High	United Kingdom	1987	Early/Late
5	9	D23/3
5	9	Montrose						Med/High		United Kingdom	1999	Late
5	9	Saxon	Multi-purpose			Trace		Medium	Medium	United Kingdom	1992	Early
5	9	Isle of Jura				None/Trace				United Kingdom	2002	Intermediate
5	9	Cabaret		Mod/Good		Trace				United Kingdom	2001	Intermediate
5	9	Eden	Floury			None		High		United Kingdom	1992	Intermediate
5	9	03M 034-002
5	9	GL.81 NT 25
5	9	Cromwell	Multi-purpose/Salad	Poor	Poor	Trace/Some	Mod/Good	High		United Kingdom	1985	Intermediate
5	9	D47-11
5	9	D49/1
5	9	H1H3 (101)
5	9	H1H3 (136)
5	10	Othello				Trace/Little		Low		United Kingdom	1996	Intermediate
5	10	Picasso	Multi-purpose/Salad	Mod/Good	V Poor	None/Trace/Little		Low/Med/High	V Low/Low	Netherlands	1994	Early/Int/Late
5	10	Paramount				None/Trace				Ireland	2003	Intermediate
5	10	Barna	Multi-purpose							Ireland	1991	Int/Late
5	10	Slaney	Multi-purpose							Ireland	1993	Late
5	10	Buchan	Multi-purpose			Trace		Medium		United Kingdom	1993	Int/Late
5	10	15144 A 3
5	10	Claret	Multi-purpose			Trace		Low/Med		United Kingdom	1996	Int/Late
5	10	Cara	Multi/Floury/Salad	Poor	Poor	None/Trace	Good	Low/Med	Low	Ireland	1973	Late/V Late
5	10	Spey				Trace		Medium		United Kingdom	1996	Intermediate
5	10	Brodie	Multi-purpose			Trace		Low/Med		United Kingdom	1993	Int/Late
5	10	Vales Everest				Trace				United Kingdom	2005	Late
5	10	Craigs Royal	Floury			None/Trace/Little	Good	Med/High	Med/High	United Kingdom	1947	Early/Int
5	10	Argos	Multi-purpose			None/Trace		Low		United Kingdom	1994	Int/Late
5	10	Vales Sovereign				Trace				United Kingdom	2003	Late
5	10	Anna	Multi-purpose/Floury	Poor	Good	Trace	Mod/Good	High		Ireland	1994	Int/Late
5	10	Amour	Multi-purpose					V Low		United Kingdom	1999	Intermediate
5	10	Lady Balfour				None				United Kingdom	2001	V Late
5	10	Kestrel	Multi-purpose/Floury			None/Trace		Med/High		United Kingdom	1992	Early
5	10	15119 AC 5

## Sheet: TableS2b_diploid genotypes
Details of diploid germplasm included in the study
Name
DM*
Solanum verrucosum
Solanum tuberosum group Phureja
Solanum chacoense
Solanum pinnatisectum
Solanum stenotomum
Solanum bulbocastanum
* sequenced doubled monoploid Solanum tuberosum group Phureja DM1-3 516 R44 clone
